# Supplementary material
Source: PubMed Central journal article supplement (PMC2875807)
Supplement: me.2010-0040_1.pdf [file me.2010-0040_1.pdf]

| NSC Number | Common Name               | Pearson | p-value  |  |  |  |
|------------|---------------------------|---------|----------|--|--|--|
| 635132     |                           | 0.59    | 6.10E-05 |  |  |  |
| 679102     |                           | 0.588   | 7.20E-06 |  |  |  |
| 153175     |                           | 0.559   | 2.20E-04 |  |  |  |
| 625354     |                           | 0.557   | 2.80E-04 |  |  |  |
| 623180     |                           | 0.543   | 2.90E-04 |  |  |  |
| 697536     |                           | 0.54    | 5.20E-05 |  |  |  |
| 117194     |                           | -0.522  | 1.00E-04 |  |  |  |
| 618332     | 2,3-dibromonaphthoquinone | 0.51    | 1.30E-04 |  |  |  |
| 7532       | Lanatoside A              | -0.508  | 1.40E-04 |  |  |  |

| GENE      | PCC   | N CELLS | P VALUE  | GENE TITLE                                                            |
|-----------|-------|---------|----------|-----------------------------------------------------------------------|
| COUPTFII  | 0.74  | 51      | 3.74E-10 | Nuclear receptor subfamily 2, group F, member 2                       |
| WDR40B    | 0.65  | 51      | 2.41E-07 | WD repeat domain 40B                                                  |
| KIAA1277  | 0.65  | 51      | 2.46E-07 | DENN/MADD domain containing 2A                                        |
| RIP140    | 0.62  | 51      | 1.00E-06 | Nuclear receptor interacting protein 1                                |
| FAS       | 0.57  | 51      | 1.04E-05 | Fas (TNF receptor superfamily, member 6)                              |
| LAMB1     | 0.57  | 51      | 1.23E-05 | Laminin, beta 1                                                       |
| LOC387882 | 0.56  | 51      | 1.62E-05 | LOC387882 hypothetical protein                                        |
| PTHR1     | 0.56  | 51      | 1.92E-05 | Parathyroid hormone receptor 1                                        |
| TCF2      | 0.56  | 51      | 2.3E-05  | Transcription factor 2, hepatic; LF-B3; variant hepatic nuclear facto |
| KIAA0870  | 0.55  | 51      | 2.64E-05 | DENN/MADD domain containing 3                                         |
| PSMC2     | 0.55  | 51      | 3.19E-05 | Proteasome (prosome, macropain) 26S subunit, ATPase, 2                |
| COLEC10   | 0.55  | 51      | 3.27E-05 | Collectin sub-family member 10 (C-type lectin)                        |
| HCFC1R1   | 0.55  | 51      | 3.32E-05 | Host cell factor C1 regulator 1 (XPO1 dependent)                      |
| MAP17     | 0.55  | 51      | 3.51E-05 | PDZK1 interacting protein 1                                           |
| RRAS2     | 0.54  | 51      | 3.70E-05 | Related RAS viral (r-ras) oncogene homolog 2                          |
| PDCD10    | -0.54 | 51      | 3.77E-05 | Programmed cell death 10                                              |
| CLSTN2    | 0.54  | 51      | 4.23E-05 | Calsyntenin 2                                                         |
| IQWD1     | -0.54 | 51      | 4.41E-05 | IQ motif and WD repeats 1                                             |
| GREM1     | 0.54  | 51      | 4.41E-05 | Gremlin 1, cysteine knot superfamily, homolog (Xenopus laevis)        |
| EDF1      | 0.54  | 51      | 4.94E-05 | Endothelial differentiation-related factor 1                          |
| SPTLC2    | 0.53  | 51      | 5.87E-05 | Serine palmitoyltransferase, long chain base subunit 2                |
| RGNEF     | 0.53  | 51      | 6.06E-05 | Rho-guanine nucleotide exchange factor                                |
| CENTA2    | 0.53  | 51      | 6.14E-05 | Centaurin, alpha 2                                                    |
| KDEL1     | 0.53  | 51      | 7.03E-05 | KDEL (Lys-Asp-Glu-Leu) containing 1                                   |
| RBMS2     | 0.52  | 51      | 8.25E-05 | RNA binding motif, single stranded interacting protein 2              |
| HSF2BP    | 0.52  | 51      | 8.34E-05 | Heat shock transcription factor 2 binding protein                     |
| TRIM59    | 0.52  | 51      | 0.0001   | Tripartite motif-containing 59                                        |
| TNFSF9    | 0.52  | 51      | 0.000101 | Tumor necrosis factor (ligand) superfamily, member 9                  |
| QPRT      | 0.51  | 51      | 0.00012  | Quinolate phosphoribosyltransferase (nicotinate-nucleotide pyrop      |
| GALNT14   | 0.51  | 51      | 0.000122 | UDP-N-acetyl-alpha-D-galactosamine:polypeptide N-acetylgalactos       |
| FZD2      | 0.51  | 51      | 0.000123 | Frizzled homolog 2 (Drosophila)                                       |
| PARD3     | 0.51  | 51      | 0.000124 | Par-3 partitioning defective 3 homolog (C. elegans)                   |
| C10orf47  | 0.51  | 51      | 0.000142 | Chromosome 10 open reading frame 47                                   |
| ARPC1A    | -0.51 | 51      | 0.000151 | Actin related protein 2/3 complex, subunit 1A, 41kDa                  |
| COL18A1   | 0.5   | 51      | 0.000165 | Collagen, type XVIII, alpha 1                                         |
| FLJ25323  | 0.5   | 51      | 0.000198 | FLJ25323 protein                                                      |
| GPR64     | 0.49  | 51      | 0.000237 | G protein-coupled receptor 64                                         |
| COBRA1    | 0.49  | 51      | 0.00025  | Cofactor of BRCA1                                                     |
| SHFM1     | -0.49 | 51      | 0.000265 | Split hand/foot malformation (ectrodactyly) type 1                    |
| FGB       | 0.49  | 51      | 0.000276 | Fibrinogen beta chain                                                 |
| ANXA4     | 0.49  | 51      | 0.000276 | Annexin A4                                                            |
| IL18      | 0.49  | 51      | 0.000284 | Interleukin 18 (interferon-gamma-inducing factor)                     |
| PIGQ      | 0.49  | 51      | 0.000301 | Phosphatidylinositol glycan, class Q                                  |
| PMPCB     | -0.49 | 51      | 0.000304 | Peptidase (mitochondrial processing) beta                             |
| SLC39A4   | 0.48  | 51      | 0.000322 | Solute carrier family 39 (zinc transporter), member 4                 |
| C16orf34  | 0.48  | 51      | 0.00036  | Chromosome 16 open reading frame 34                                   |
| OSAP      | 0.48  | 51      | 0.000392 | Ovary-specific acidic protein                                         |
| NUP188    | -0.47 | 51      | 0.000441 | Nucleoporin 188kDa                                                    |
| LOC116441 | 0.47  | 51      | 0.000448 | Similar to R28379_1                                                   |
| TNFAIP1   | -0.47 | 51      | 0.000452 | Tumor necrosis factor, alpha-induced protein 1 (endothelial)          |

|               |       |    |          |                                                                  |
|---------------|-------|----|----------|------------------------------------------------------------------|
| ABCB1         | 0.47  | 51 | 0.000481 | ATP-binding cassette, sub-family B (MDR/TAP), member 1           |
| FLJ20245      | 0.47  | 51 | 0.000514 | Hypothetical gene supported by BC027323                          |
| TK1           | 0.46  | 51 | 0.000594 | Thymidine kinase 1, soluble                                      |
| RAB5A         | -0.46 | 51 | 0.000664 | RAB5A, member RAS oncogene family                                |
| MGC10946      | -0.46 | 51 | 0.000704 | Hypothetical protein MGC10946                                    |
| FGFBP1        | 0.46  | 51 | 0.000706 | Fibroblast growth factor binding protein 1                       |
| RBPMS         | 0.46  | 51 | 0.000726 | RNA binding protein with multiple splicing                       |
| NHS           | 0.46  | 51 | 0.000774 | Nance-Horan syndrome (congenital cataracts and dental anomalies) |
| KIAA1609      | 0.45  | 51 | 0.000808 | KIAA1609 protein                                                 |
| TUBA6         | 0.45  | 51 | 0.000813 | Tubulin, alpha 6                                                 |
| DKFZp434K1815 | -0.45 | 51 | 0.000889 | Hypothetical protein DKFZp434K1815                               |
| KTN1          | 0.45  | 51 | 0.000911 | Kinectin 1 (kinesin receptor)                                    |
| FY            | 0.45  | 51 | 0.000929 | Duffy blood group                                                |
| TERF1         | 0.45  | 51 | 0.000937 | Telomeric repeat binding factor (NIMA-interacting) 1             |

**Supplemental Table 3.** Nuclear receptor nomenclature.

| Common name                                                                                             | Common abbreviation | Official name |                   |
|---------------------------------------------------------------------------------------------------------|---------------------|---------------|-------------------|
|                                                                                                         |                     | NRNC*         | HUGO <sup>†</sup> |
| Androgen receptor                                                                                       | AR                  | NR3C4         | AR                |
| Constitutive androstane receptor                                                                        | CAR                 | NR1I3         | NR1I3             |
| Chicken ovalbumin upstream promoter-transcription factor alpha                                          | COUP-TFI            | NR2F1         | NR2F1             |
| Chicken ovalbumin upstream promoter-transcription factor beta                                           | COUP-TFII           | NR2F2         | NR2F2             |
| Dosage-sensitive sex reversal-adrenal hypoplasia congenital critical region on the X chromosome, gene 1 | DAX-1               | NR0B1         | NR0B1             |
| v-erb-a avian erythroblastic leukemia viral oncogene homolog-like 2                                     | EAR2                | NR2F6         | NR2F6             |
| Estrogen receptor alpha                                                                                 | ER $\alpha$         | NR3A1         | ESR1              |
| Estrogen receptor beta                                                                                  | ER $\beta$          | NR3A2         | ESR2              |
| Estrogen-related receptor alpha                                                                         | ERR $\alpha$        | NR3B1         | ESRRA             |
| Estrogen-related receptor beta                                                                          | ERR $\beta$         | NR3B2         | ESRRB             |
| Estrogen-related receptor gamma                                                                         | ERR $\gamma$        | NR3B3         | ESRRG             |
| Farnesoid X receptor alpha                                                                              | FXR $\alpha$        | NR1H4         | NR1H4             |
| Farnesoid X receptor beta                                                                               | FXR $\beta$         | NR1H5         | NR1H5P            |
| Germ cell nuclear factor                                                                                | GCNF                | NR6A1         | NR6A1             |
| Glucocorticoid receptor                                                                                 | GR                  | NR3C1         | NR3C1             |
| Hepatocyte nuclear factor 4 alpha                                                                       | HNF4 $\alpha$       | NR2A1         | HNF4A             |
| Hepatocyte nuclear factor 4 gamma                                                                       | HNF4 $\gamma$       | NR2A2         | HNF4G             |
| Liver receptor homolog-1                                                                                | LRH-1               | NR5A2         | NR5A2             |
| Liver X receptor alpha                                                                                  | LXR $\alpha$        | NR1H3         | NR1H3             |
| Liver X receptor beta                                                                                   | LXR $\beta$         | NR1H2         | NR1H2             |
| Mineralocorticoid receptor                                                                              | MR                  | NR3C2         | NR3C2             |
| Nerve growth factor induced gene B                                                                      | NGFIB               | NR4A1         | NR4A1             |
| Neuron-derived orphan receptor 1                                                                        | NOR1                | NR4A3         | NR4A3             |
| Nur-related factor 1                                                                                    | NURR1               | NR4A2         | NR4A2             |
| Photoreceptor cell-specific nuclear receptor                                                            | PNR                 | NR2E3         | NR2E3             |
| Peroxisome proliferator-activated receptor alpha                                                        | PPAR $\alpha$       | NR1C1         | PPARA             |
| Peroxisome proliferator-activated receptor beta                                                         | PPAR $\delta$       | NR1C2         | PPARD             |
| Peroxisome proliferator-activated receptor gamma                                                        | PPAR $\gamma$       | NR1C3         | PPARG             |
| Progesterone receptor                                                                                   | PR                  | NR3C3         | PGR               |
| Pregnane X receptor                                                                                     | PXR                 | NR1I2         | NR1I2             |
| Retinoic acid receptor alpha                                                                            | RAR $\alpha$        | NR1B1         | RARA              |
| Retinoic acid receptor beta                                                                             | RAR $\beta$         | NR1B2         | RARB              |
| Retinoic acid receptor gamma                                                                            | RAR $\gamma$        | NR1B3         | RARG              |
| Reverse-erb alpha                                                                                       | REV-ERB $\alpha$    | NR1D1         | NR1D1             |
| Reverse-erb beta                                                                                        | REV-ERB $\beta$     | NR1D2         | NR1D2             |
| Retinoic acid-related orphan receptor alpha                                                             | ROR $\alpha$        | NR1F1         | RORA              |
| Retinoic acid-related orphan receptor beta                                                              | ROR $\beta$         | NR1F2         | RORB              |
| Retinoic acid-related orphan receptor gamma                                                             | ROR $\gamma$        | NR1F3         | RORC              |
| Retinoid X receptor alpha                                                                               | RXR $\alpha$        | NR2B1         | RXRA              |
| Retinoid X receptor beta                                                                                | RXR $\beta$         | NR2B2         | RXRB              |
| Retinoid X receptor gamma                                                                               | RXR $\gamma$        | NR2B3         | RXRG              |
| Steroidogenic factor 1                                                                                  | SF1                 | NR5A1         | NR5A1             |
| Small heterodimeric partner                                                                             | SHP                 | NR0B2         | NR0B2             |
| Tailless homolog orphan receptor                                                                        | TLX                 | NR2E1         | NR2E1             |
| Testicular orphan receptor 2                                                                            | TR2                 | NR2C1         | NR2C1             |
| Testicular orphan receptor 4                                                                            | TR4                 | NR2C2         | NR2C2             |
| Thyroid hormone receptor alpha                                                                          | TR $\alpha$         | NR1A1         | THRA              |
| Thyroid hormone receptor beta                                                                           | TR $\beta$          | NR1A2         | THRB              |
| Vitamin D receptor                                                                                      | VDR                 | NR1I1         | VDR               |

\*: Nuclear Receptor Nomenclature Committee; <sup>†</sup>: Human Genome Organization
